# Supplementary material for: Ultrashort Cationic Peptide Fmoc-FFK as Hydrogel Building Block for Potential Biomedical Applications
Source: MDPI journal article supplement (doi:10.3390/gels10010012), 2023-12-22
Supplement: s1 [file s1]

# Ultrashort Cationic Peptide Fmoc-FFK as Hydrogel Building Block for Potential Biomedical Applications

Enrico Gallo <sup>1</sup>, Carlo Diaferia <sup>2</sup>, Sabrina Giordano <sup>1</sup>, Elisabetta Rosa <sup>2</sup>, Barbara Carrese <sup>1</sup>, Gennaro Piccialli <sup>2</sup>, Nicola Borbone <sup>2</sup>, Giancarlo Morelli <sup>2</sup>, Giorgia Oliviero <sup>3</sup> and Antonella Accardo <sup>2,\*</sup>

<sup>1</sup> IRCCS SYNLAB SDN, Via Gianturco 113, 80143 Naples, Italy; enrico.gallo@synlab.it (E.G.); sabrina.giordano@synlab.it (S.G.); barbara.carrese@synlab.it (B.C.)

<sup>2</sup> Department of Pharmacy, University of Naples "Federico II", Via D. Montesano 49, 80131 Naples, Italy; carlo.diaferia@unina.it (C.D.); elisabetta.rosa@unina.it (E.R.); gennaro.piccialli@unina.it (G.P.); nicola.borbone@unina.it (N.B.); gmorelli@unina.it (G.M.)

<sup>3</sup> Department of Molecular Medicine and Medical Biotechnologies, University of Naples "Federico II", Via S. Pansini 5, 80131 Naples, Italy; giorgia.oliviero@unina.it

\* Correspondence: antonella.accardo@unina.it

## Supplementary Materials

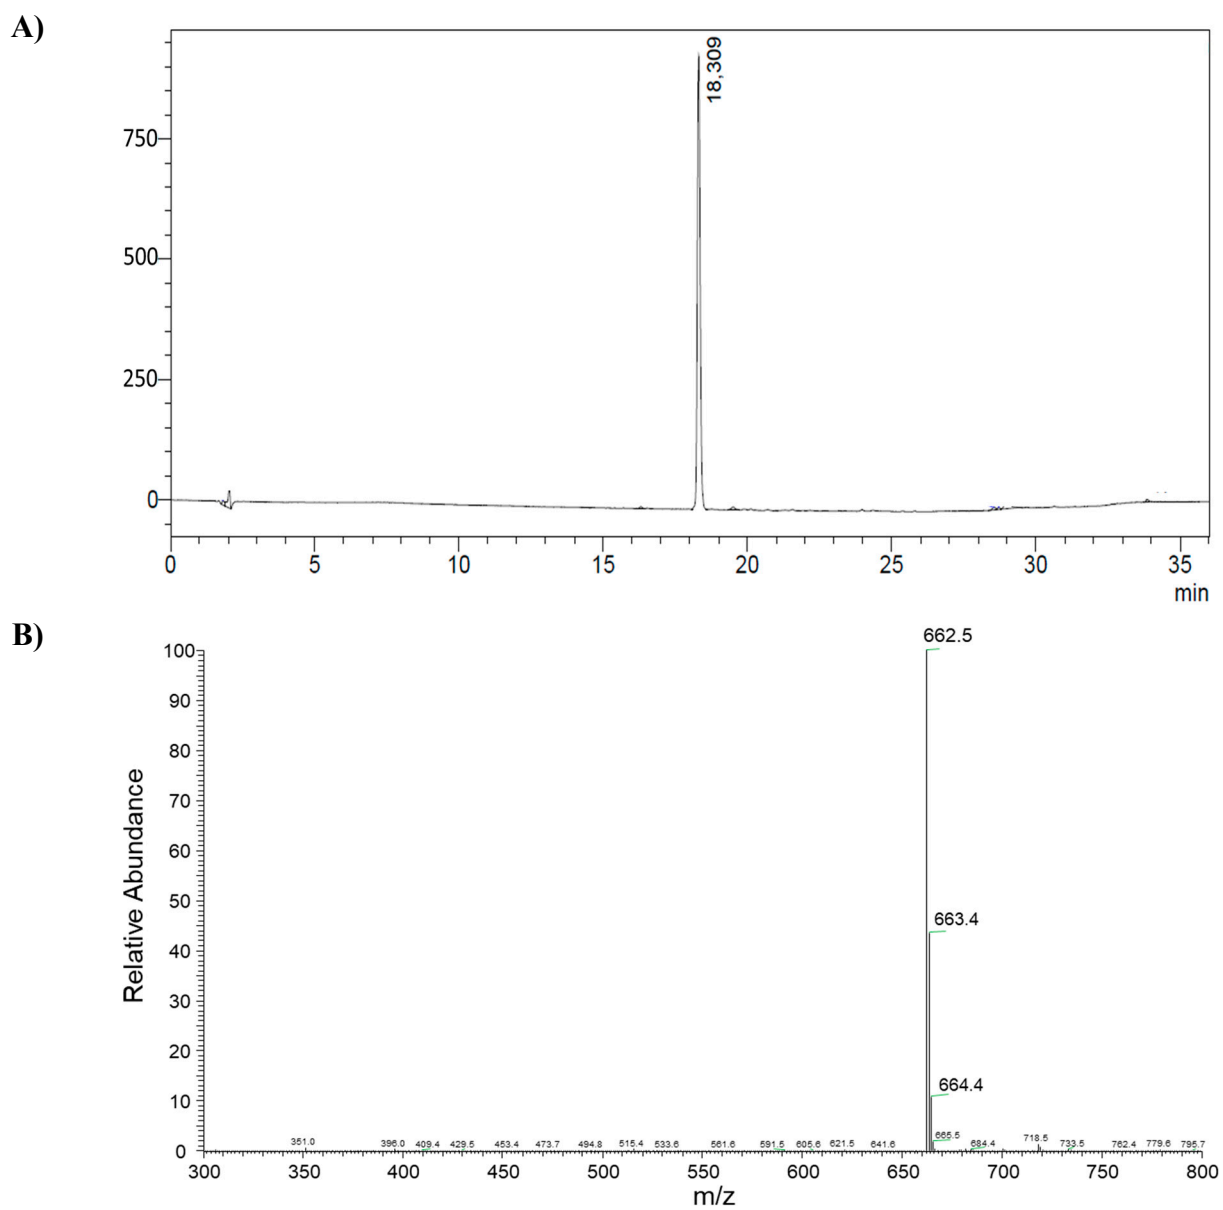

**Figure S1:** Physicochemical characterization of Fmoc-FFK peptide: A) RP-HPLC chromatography and B) ESI mass spectrum

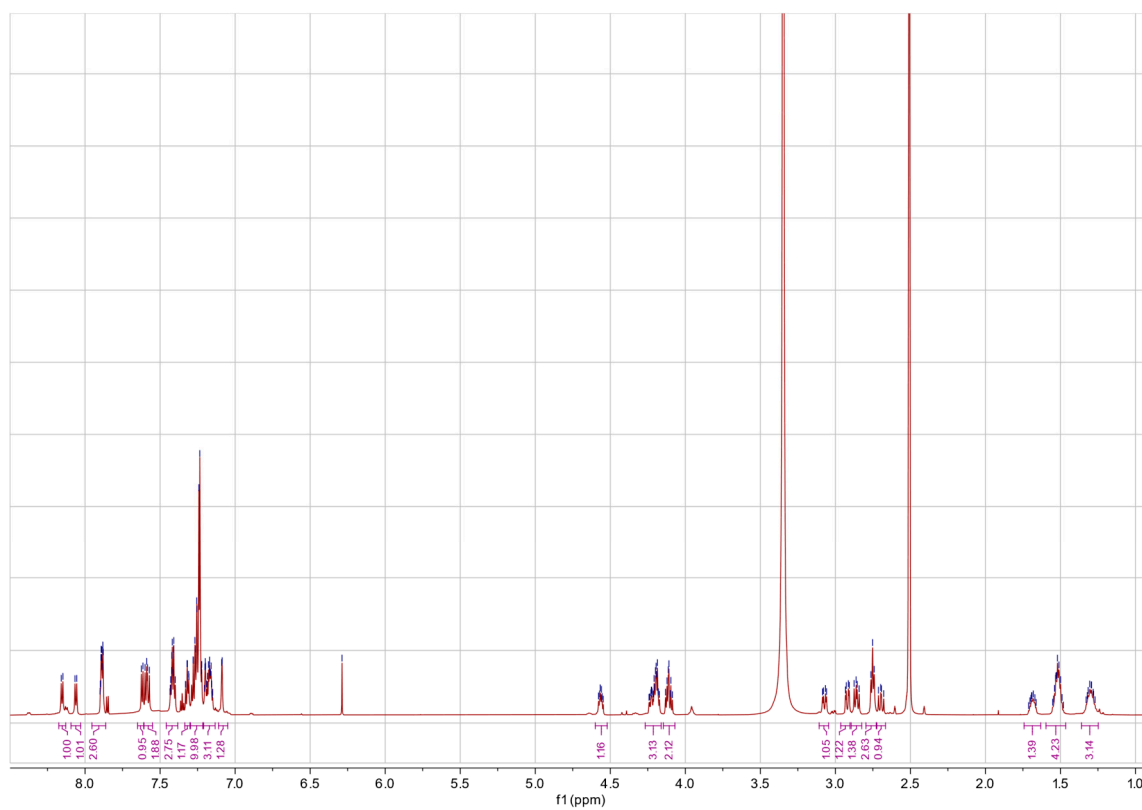

**Figure S2:**  $^1\text{H}$ NMR spectrum of Fmoc-FFK.

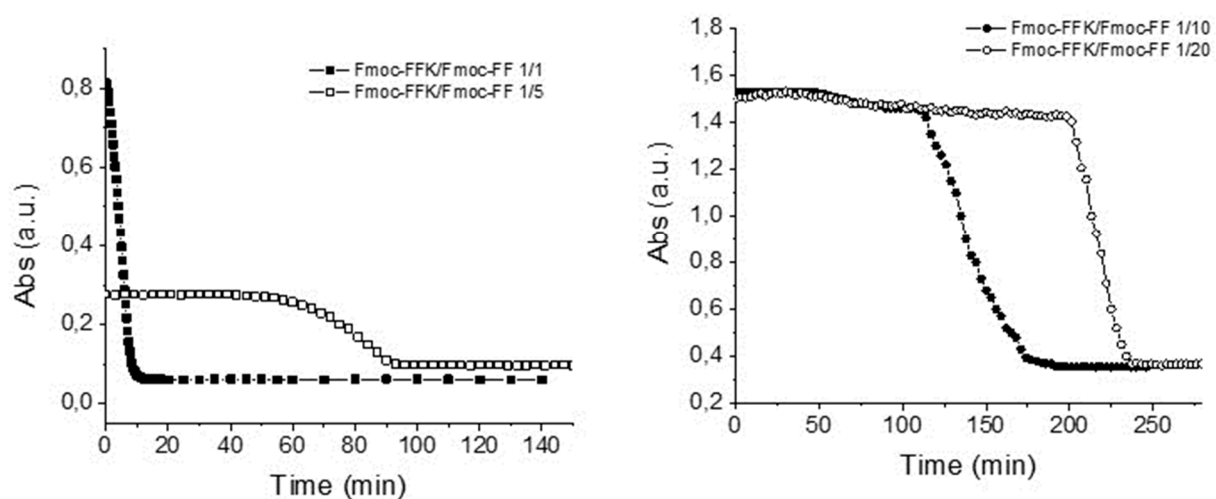

**Figure S3:** UV-Vis profiles of mixed hydrogels (at different molar ratios) in the long range as function of the time.

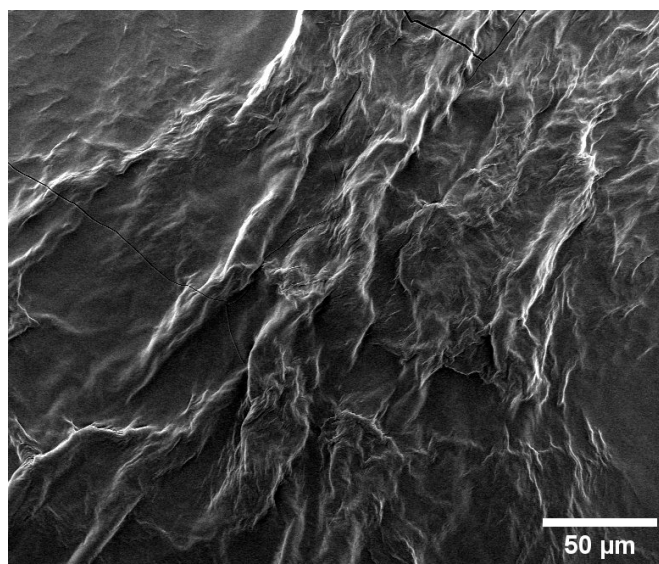

**Figure S4:** Microphotos of pure xerogels of Fmoc-FFK 2.0 wt %. Scale bar 50 μm.

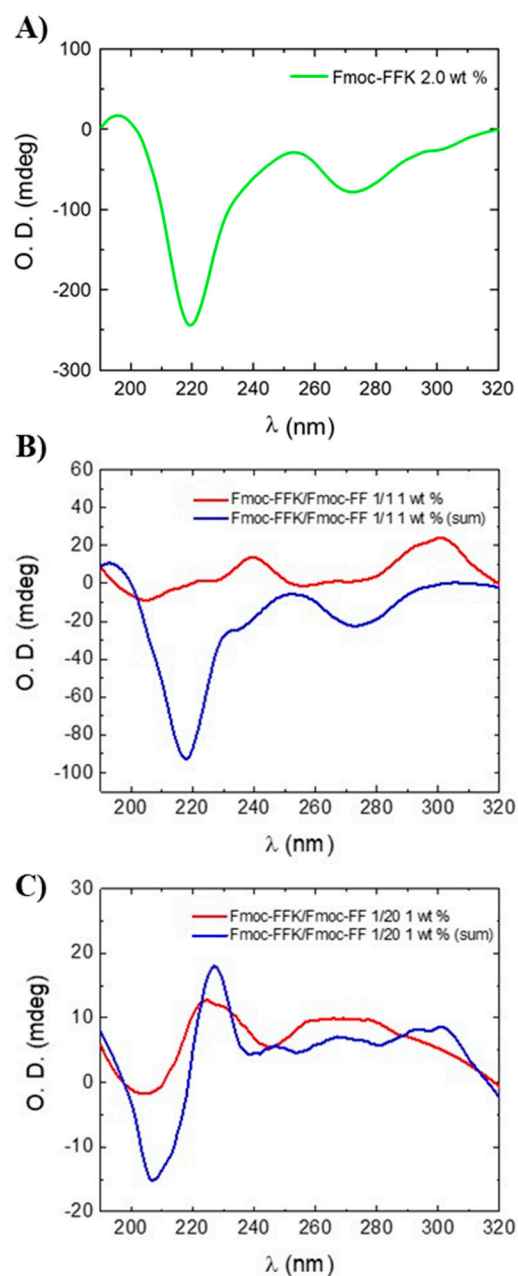

**Figure S5:** CD spectra in optical density of: A) Fmoc-FFK 2.0 wt%, B) mixed Fmoc-FFK/Fmoc-FF 1/1 at 1.0 wt%, and C) mixed Fmoc-FFK/Fmoc-FF 1/20 at 1.0 wt% (red lines). These spectra of the two mixed hydrogels are reported in comparison to the CD sum of Fmoc-FFK/Fmoc-FF 1/1 and 1/20 (blue lines).

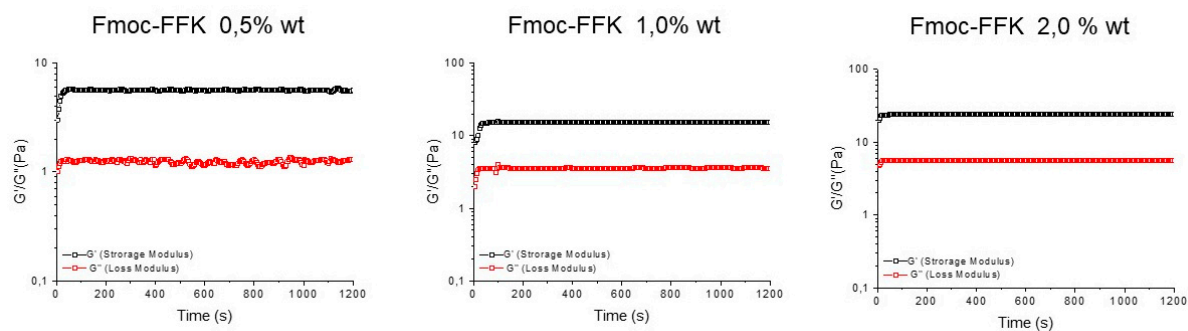

**Figure S6:** Time sweep (20 minutes) for pure Fmoc-FFK hydrogels at three different concentrations 0.5, 1.0 and 2.0 wt %. Rheological analysis is reported in terms of  $G'$  (Storage modulus) and  $G''$  (Loss modulus).

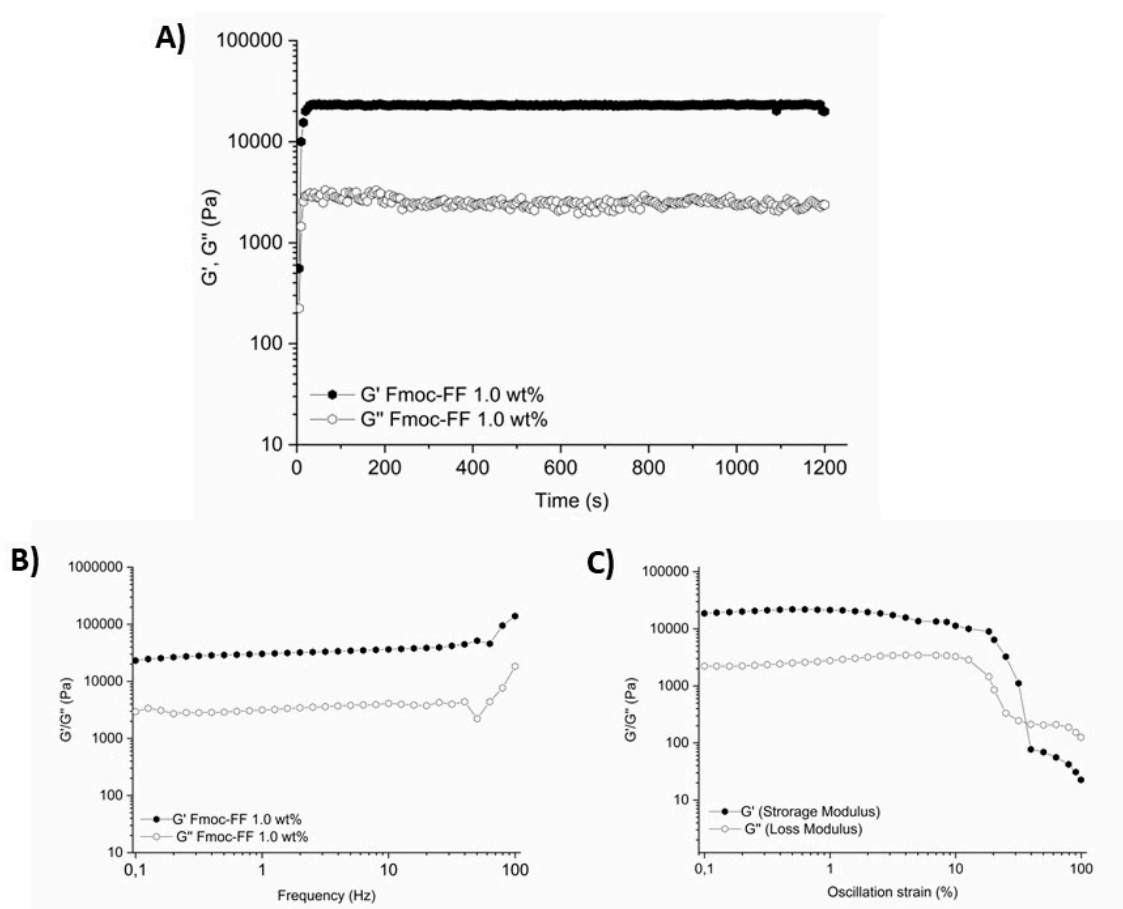

**Figure S7:** Rheological characterization of self-assembled Fmoc-FF hydrogel: A) time sweep (20 minutes) reported in terms of  $G'$  (Storage modulus) and  $G''$  (Loss modulus), B) frequency and C) oscillation strain.

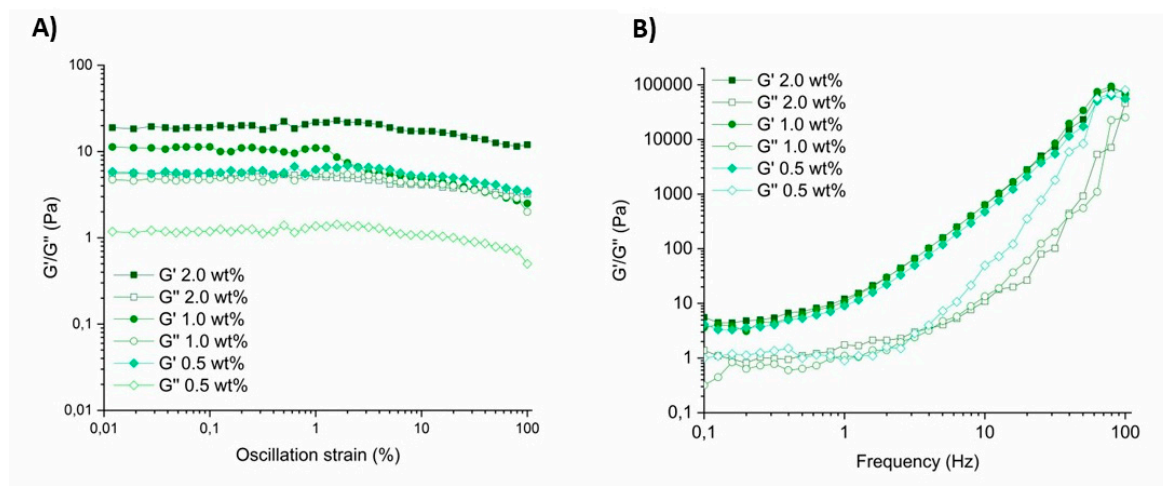

**Figure S8:** Rheological characterization of self-assembled Fmoc-FFK hydrogels at 0.5wt%, 1.0wt% and 2.0 wt%: A) frequency and B) oscillation strain.

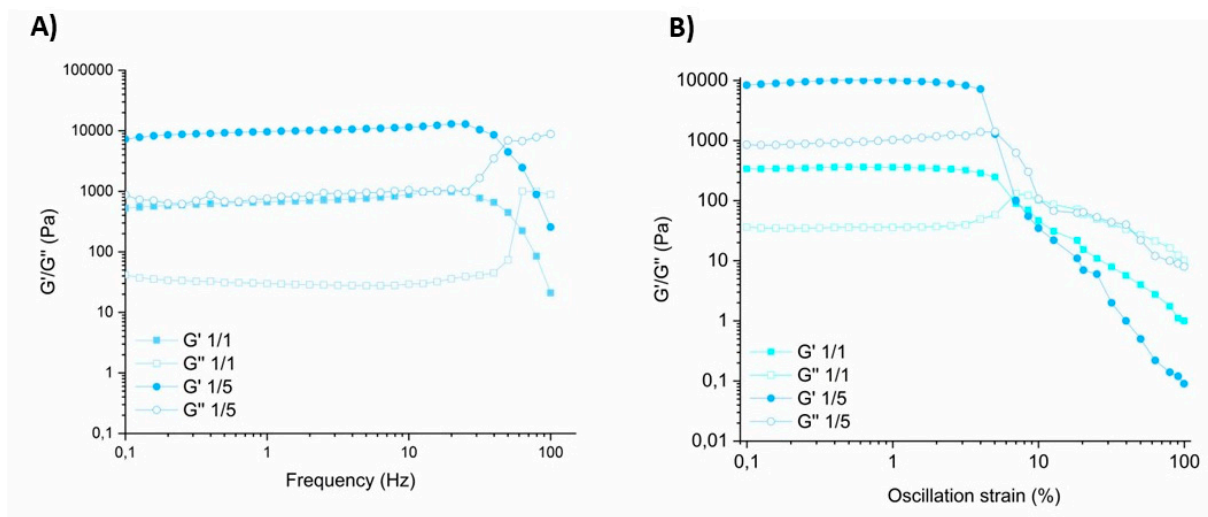

**Figure S9:** Rheological characterization of mixed Fmoc-FF/Fmoc-FFK hydrogels at 1/1 and 1/5 w/w ratio: A) frequency and B) oscillation strain.



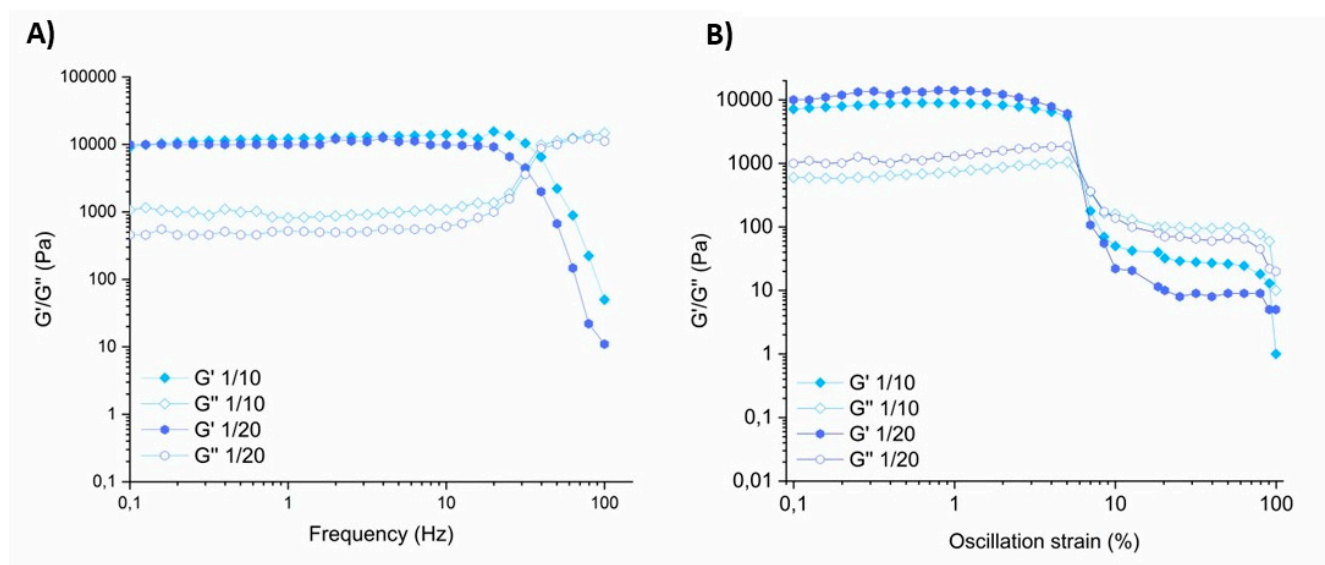

**Figure S10:** Rheological characterization of mixed Fmoc-FF/Fmoc-FFK hydrogels at 1/10 and 1/20 w/w ratio: A) frequency and B) oscillation strain.

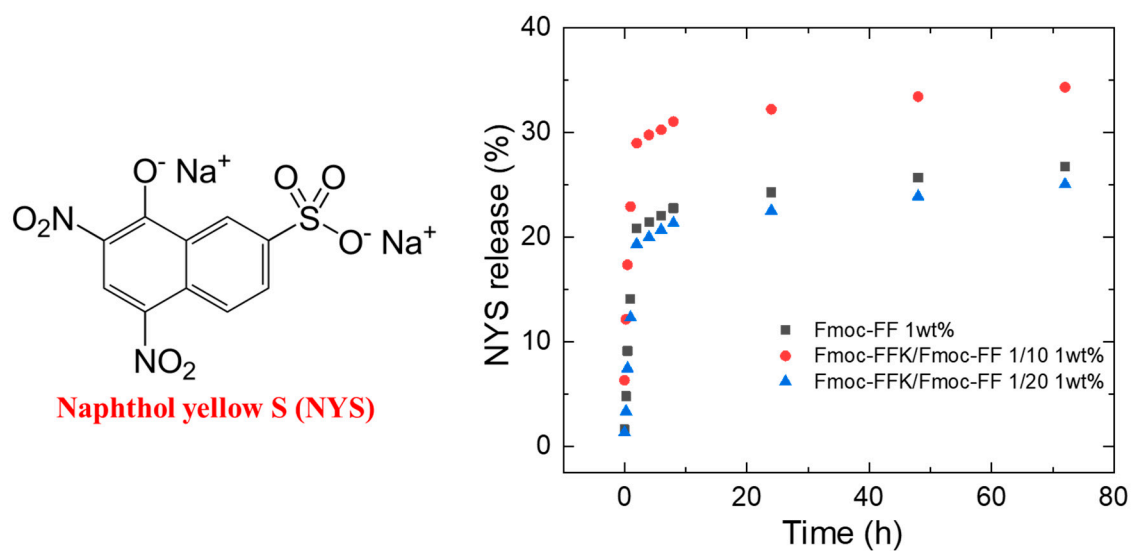

**Figure S11:** On the left: chemical structure of NYS; on the right: release kinetics of NYS from Fmoc-FF, Fmoc-FFK/Fmoc-FF 1/10 and 1/20 HGs.

**Table S1:** swelling test results for multicomponent hydrogel Fmoc-FFK/Fmoc-FF in comparison to the other mixed or pure hydrogels from the literature based on Fmoc-FF peptide.

| <i>HGs sample</i> | <i>Concentration (wt%)</i> | <i>Ratio (w/w)</i> | <i>q %</i> |
|-------------------|----------------------------|--------------------|------------|
| Fmoc-FF           | 1.0                        | -                  | 29.0       |
| Fmoc-FFK          | 0.5                        | -                  | 32.4       |
|                   | 1.0                        | -                  | 34.0       |
|                   | 2.0                        | -                  | 37.5       |
| Fmoc-FFK/Fmoc-FF  | 1.0                        | 1/1                | 35.0       |
|                   |                            | 1/5                | 35.1       |
|                   |                            | 1/10               | 33.8       |
|                   |                            | 1/20               | 33.7       |
| Fmoc-FFC/Fmoc-FF  | 1.0                        | 1/5                | 38.6       |
|                   |                            | 1/10               | 36.2       |
|                   |                            | 1/20               | 33.2       |
| Fmoc-FFS/Fmoc-FF  | 1.0                        | 1/5                | 34.0       |
|                   |                            | 1/10               | 34.8       |
|                   |                            | 1/20               | 36.0       |
| Fmoc-FFT/Fmoc-FF  | 1.0                        | 1/5                | 37.0       |
|                   |                            | 1/10               | 37.9       |
|                   |                            | 1/20               | 41.0       |

**Table S2:** Quantitative multivariate percentage analysis for secondary structure estimation (SEE) achieved *via* method of principal component regression (PCR) with Jasco SEE® dedicated software.

| <i>HGs system</i>      | <i><math>\alpha</math>-helix (%)</i> | <i><math>\beta</math>-sheet (%)</i> | <i><math>\beta</math>-turn (%)</i> | <i>Others (%)</i> |
|------------------------|--------------------------------------|-------------------------------------|------------------------------------|-------------------|
| Fmoc-FFK 2.0 wt%       | 0                                    | 56                                  | 21                                 | 23                |
| Fmoc-FF/ Fmoc-FFK 1/1  | 10                                   | 50                                  | 19                                 | 21                |
| Fmoc-FF/ Fmoc-FFK 1/5  | 58                                   | 12                                  | 17                                 | 13                |
| Fmoc-FF/ Fmoc-FFK 1/10 | 66                                   | 8                                   | 13                                 | 13                |
| Fmoc-FF/ Fmoc-FFK 1/20 | 69                                   | 2                                   | 12                                 | 17                |
